# Supplementary material
Source: PubMed Central journal article supplement (PMC5528356)
Supplement: MOL2-6-418-s001.pdf [file MOL2-6-418-s001.pdf]

| <b>Supplementary Table 1: Antibodies for western immunoblotting</b> |                                        |                   |                             |                 |
|---------------------------------------------------------------------|----------------------------------------|-------------------|-----------------------------|-----------------|
| <b>Antigen</b>                                                      | <b>phospho-site</b>                    | <b>Catalog no</b> | <b>Company</b>              | <b>Dilution</b> |
| VEGFR2                                                              | -                                      | sc-504            | Santa Cruz <sup>1</sup>     | 1:500           |
| pVEGFR2                                                             | Tyr <sup>1054/1059</sup>               | ab5473            | Abcam <sup>2</sup>          | 1:1000          |
| pVEGFR2                                                             | Tyr <sup>1175</sup>                    | 19A10             | Cell Signaling <sup>3</sup> | 1:1000          |
| pVEGFR2                                                             | Tyr <sup>996</sup>                     | 2474              | Cell Signaling <sup>3</sup> | 1:1000          |
| EGFR                                                                | -                                      | 610016            | BD <sup>4</sup>             | 1:1000          |
| pEGFR                                                               | Tyr <sup>1179</sup>                    | ab47394           | Abcam <sup>2</sup>          | 1:1000          |
| Annexin A2                                                          | -                                      | 610068            | BD <sup>4</sup>             | 1:5000          |
| pAnnexin A2                                                         | Tyr <sup>24</sup>                      | sc-135753         | Santa Cruz <sup>1</sup>     | 1:200           |
| PLCγ1                                                               | -                                      | 2822              | Cell Signaling <sup>3</sup> | 1:1000          |
| pPLCγ1                                                              | Tyr <sup>771</sup>                     | 07-506            | Upstate <sup>5</sup>        | 1:1000          |
| Akt                                                                 | -                                      | 4691              | Cell Signaling <sup>3</sup> | 1:1000          |
| pAkt                                                                | Ser <sup>473</sup>                     | 4058              | Cell Signaling <sup>3</sup> | 1:1000          |
| ERK                                                                 | -                                      | 9102              | Cell Signaling <sup>3</sup> | 1:1000          |
| pErk1/2                                                             | Thr <sup>202</sup> /Tyr <sup>204</sup> | 9101              | Cell Signaling <sup>3</sup> | 1:1000          |

1. Santa Cruz Biotechnology, CA, USA
2. Abcam, Cambridge, UK
3. Cell Signaling Technology, Hertfordshire, UK
4. BD Transduction Laboratories, USA
5. Upstate Cell Signaling, Lake Placid, NY
