# Supplementary material
Source: PubMed Central journal article supplement (PMC5528356)
Supplement: MOL2-6-418-s002.pdf [file MOL2-6-418-s002.pdf]

**Supplementary Table 2:**

Fold changes in kinase activity in the basal-like xenografts, three and ten days after bevacizumab treatment

**Bevacizumab/Control**

| <b>Kinase substrate</b> | <b>SwissProt ID</b> | <b>Day 3</b> | <b>Day 10</b> |
|-------------------------|---------------------|--------------|---------------|
| ACHD_Y383/Y390          | Q07001              | 1.99         | 0.77          |
| ANXA2_Y24               | P07355              | 2.05         | -             |
| B3AT_Y46                | P02730              | -            | 0.64          |
| C1R_Y204/Y210           | P00736              | -            | 0.77          |
| CBL_Y700                | P22681              | 2.23         | 0.69          |
| CD3Z_Y123               | P20963              | 1.55         | -             |
| CD79A_Y182/Y188         | P11912              | 1.63         | -             |
| CDK2_Y15/Y19            | P24941              | 1.59         | -             |
| CDK7_Y169               | P50613              | 1.72         | -             |
| CTNB1_Y86               | P35222              | 1.80         | -             |
| DCX_Y112                | O43602              | 1.59         | -             |
| EGFR_Y1110              | P00533              | 2.06         | -             |
| EGFR_Y1172              | P00533              | 1.71         | 0.79          |
| EGFR_Y1197              | P00533              | 2.63         | 0.78          |
| ENOG_Y44                | P09104              | 1.63         | -             |
| EPHA1_Y781              | P21709              | 1.49         | 0.73          |
| EPHA2_Y772              | P29317              | 1.46         | -             |
| EPHA7_Y608/Y614         | Q15375              | 1.67         | -             |
| EPHB1_Y778              | P54762              | 1.60         | 0.85          |
| EPOR_Y368               | P19235              | 1.77         | -             |
| EPOR_Y426               | P19235              | 1.51         | -             |
| ERBB2_Y1248             | P04626              | 1.44         | -             |
| ERBB2_Y877              | P04626              | 1.70         | -             |
| ERBB4_Y1284             | Q15303              | 1.47         | -             |
| FAK1_Y570/Y576/Y577     | Q05397              | 1.75         | -             |
| FAK2_Y573/Y579/Y580     | Q14289              | 1.74         | 0.78          |
| FER_Y714                | P16591              | 1.88         | -             |
| FES_Y713                | P07332              | 1.70         | 0.80          |
| FGFR1_Y766              | P11362              | -            | 0.73          |
| FGFR2_Y769              | P21802              | 2.01         | 0.71          |
| FGFR3_Y760              | P22607              | 2.01         | 0.78          |
| FRK_Y387                | P42685              | 1.81         | 0.78          |
| JAK1_Y1022/Y1023        | P23458              | 1.76         | -             |
| K2C6B_Y62               | P04259              | 1.69         | -             |
| LAT_Y200                | O43561              | 1.96         | 0.68          |
| LAT_Y255                | O43561              | 1.79         | 0.68          |
| LCK_Y394                | P06239              | 1.99         | -             |
| MBP_Y203                | P02686              | 1.65         | -             |
| MBP_Y261/Y268           | P02686              | 1.61         | -             |
| MBP_Y268                | P02686              | 1.30         | 0.70          |
| MET_Y1230/Y1234/Y1235   | P08581              | 1.43         | -             |
| MK01_Y187               | P28482              | 1.42         | -             |
| MK07_Y215/Y220          | Q13164              | 1.50         | 0.86          |
| MK10_Y223/Y228          | P53779              | 1.66         | -             |
| MK12_Y185               | P53778              | 1.48         | -             |
| NTRK2_Y702/Y706/Y707    | Q16620              | 1.63         | -             |
| ODBA_Y345               | P12694              | 1.46         | -             |
| P85A_Y607               | P27986              | 1.58         | 0.85          |
| PAXI_Y118               | P49023              | 1.70         | -             |
| PAXI_Y31/Y33            | P49023              | 1.55         | -             |
| PDGFRB_Y1009            | P09619              | 1.86         | -             |
| PDGFRB_Y1021            | P09619              | 1.84         | 0.77          |
| PDGFRB_Y579/Y581        | P09619              | 1.64         | 0.85          |
| PDGFRB_Y716             | P09619              | 1.75         | -             |

|                           |        |      |      |
|---------------------------|--------|------|------|
| PDGFRB_Y771/Y775/Y778     | P09619 | 1.53 | -    |
| PDPK1_Y373/Y376           | O15530 | 1.49 | -    |
| PDPK1_Y9                  | O15530 | 1.97 | -    |
| PECA1_Y713                | P16284 | 1.90 | -    |
| PLCG1_Y771/Y775           | P19174 | 1.30 | -    |
| PP2AB_Y307                | P62714 | 1.46 | -    |
| PR_Y795                   | P06401 | 1.44 | -    |
| PRRX2_Y208/Y214           | Q99811 | 1.60 | -    |
| PTN11_Y546/Y551           | Q06124 | 1.30 | -    |
| RAF1_Y340/Y341            | P04049 | 1.55 | -    |
| RASA1_Y460                | P20936 | 1.80 | -    |
| RET_Y1029                 | P07949 | 1.33 | -    |
| RON_Y1353                 | Q04912 | 2.05 | -    |
| SRC8_CHICK_Y477/Y483      | Q01406 | 1.39 | -    |
| SRC8_CHICK_Y492/Y499/Y502 | Q01406 | 1.64 | 0.79 |
| TEC_Y513/Y519             | P42680 | 1.45 | -    |
| TNNT1_Y9                  | P13805 | -    | 0.57 |
| VEGFR1_Y1327/Y1333        | P17948 | 1.47 | -    |
| VEGFR2_Y1054/Y1059        | P35968 | 1.47 | -    |
| VEGFR2_Y951               | P35968 | 1.52 | -    |
| VEGFR2_Y996               | P35968 | 1.30 | -    |
| VINC_Y822                 | P18206 | 1.46 | -    |
| ZAP70_Y492/Y493           | P43403 | 1.61 | -    |

All values are estimated with  $p < 0.05$  and  $FDR = 0.1$

Supplementary table 2: Lindholm et al.
