# Supplementary material
Source: PubMed Central journal article supplement (PMC5528356)
Supplement: MOL2-6-418-s003.pdf [file MOL2-6-418-s003.pdf]

**Supplementary Table 3:**

Fold changes in kinase activity in the basal-like xenografts, three and ten days after doxorubicin treatment

| <b>Doxorubicin/Control</b> |                     |              |               |
|----------------------------|---------------------|--------------|---------------|
| <b>Kinase substrate</b>    | <b>SwissProt ID</b> | <b>Day 3</b> | <b>Day 10</b> |
| ACHD_Y383/Y390             | Q07001              | 1.76         | 0.70          |
| AMPE_Y12                   | Q07075              | -            | 0.77          |
| ANXA1_Y21                  | P04083              | -            | 0.79          |
| ANXA2_Y24                  | P07355              | 2.02         | -             |
| CBL_Y700                   | P22681              | 1.70         | 0.81          |
| CD3Z_Y123                  | P20963              | 1.57         | -             |
| CD79A_Y182/Y188            | P11912              | 1.53         | -             |
| CDK2_Y15/Y19               | P24941              | 1.69         | -             |
| CDK7_Y169                  | P50613              | 1.57         | -             |
| CTNB1_Y86                  | P35222              | 1.83         | -             |
| DCX_Y112                   | O43602              | 1.59         | -             |
| DDR1_Y513                  | Q08345              | -            | 0.48          |
| EGFR_Y1110                 | P00533              | 2.23         | -             |
| EGFR_Y1172                 | P00533              | 1.53         | 0.83          |
| EGFR_Y1197                 | P00533              | 2.32         | -             |
| ENOG_Y44                   | P09104              | 1.57         | -             |
| EPHA1_Y781                 | P21709              | 1.38         | 0.73          |
| EPHA2_Y772                 | P29317              | 1.50         | 0.78          |
| EPHA7_Y608/Y614            | Q15375              | 1.52         | 0.85          |
| EPOR_Y368                  | P19235              | 1.72         | 0.85          |
| EPOR_Y426                  | P19235              | 1.64         | -             |
| ERBB2_Y1248                | P04626              | 1.42         | -             |
| ERBB2_Y877                 | P04626              | 1.54         | -             |
| ERBB4_Y1284                | Q15303              | 1.33         | -             |
| FAK1_Y570/Y576/Y577        | Q05397              | 1.54         | -             |
| FAK2_Y573/Y579/Y580        | Q14289              | 1.55         | 0.80          |
| FER_Y714                   | P16591              | 1.86         | 0.85          |
| FES_Y713                   | P07332              | 1.72         | 0.76          |
| FGFR2_Y769                 | P21802              | 1.75         | 0.75          |
| FGFR3_Y760                 | P22607              | 1.74         | -             |
| FRK_Y387                   | P42685              | 1.72         | 0.74          |
| JAK1_Y1022/Y1023           | P23458              | 1.71         | -             |
| JAK2_Y570                  | O60674              | 1.66         | -             |
| K2C6B_Y62                  | P04259              | 1.52         | -             |
| LAT_Y200                   | O43561              | 1.72         | 0.80          |
| LAT_Y255                   | O43561              | 1.60         | 0.76          |
| LCK_Y394                   | P06239              | 1.99         | -             |
| MBP_Y203                   | P02686              | 1.58         | 0.79          |
| MBP_Y261/Y268              | P02686              | 1.50         | -             |
| MBP_Y268                   | P02686              | 1.24         | 0.69          |
| MET_Y1230/Y1234/Y1235      | P08581              | 1.42         | -             |
| MK01_Y187                  | P28482              | 1.44         | -             |
| MK07_Y215/Y220             | Q13164              | 1.48         | 0.85          |
| MK10_Y223, 228             | P53779              | 1.67         | -             |
| MK12_Y185                  | P53778              | 1.45         | -             |
| ODBA_Y345                  | P12694              | 1.46         | -             |
| P85A_Y607                  | P27986              | 1.52         | -             |
| PAXI_Y118                  | P49023              | 1.66         | -             |
| PAXI_Y31/Y33               | P49023              | 1.64         | -             |
| PDGFRB_Y1009               | P09619              | 1.98         | -             |
| PDGFRB_Y1021               | P09619              | 1.60         | 0.87          |
| PDGFRB_Y579/Y581           | P09619              | 1.54         | -             |
| PDGFRB_Y716                | P09619              | 1.74         | -             |
| PDGFRB_Y771/Y775/Y778      | P09619              | 1.58         | -             |
| PDPK1_Y373/Y376            | O15530              | 1.47         | -             |

|                           |        |      |      |
|---------------------------|--------|------|------|
| PDPK1_Y9                  | O15530 | 2.03 | -    |
| PECA1_Y713                | P16284 | 1.94 | -    |
| PLCG1_Y771/Y775           | P19174 | 1.27 | -    |
| PP2AB_Y307                | P62714 | 1.35 | -    |
| PR_Y795                   | P06401 | 1.49 | -    |
| PRRX2_Y208/Y214           | Q99811 | 1.77 | -    |
| PTN11_Y546/Y551           | Q06124 | 1.24 | 0.73 |
| RAF1_Y340/Y341            | P04049 | 1.53 | -    |
| RASA1_Y460                | P20936 | 1.83 | -    |
| RON_Y1353                 | Q04912 | 2.06 | -    |
| SRC8_CHICK_Y477/Y483      | Q01406 | 1.48 | -    |
| SRC8_CHICK_Y492/Y499/Y502 | Q01406 | 1.45 | 0.85 |
| TEC_Y513/Y519             | P42680 | 1.40 | -    |
| TNNT1_Y9                  | P13805 | -    | 0.70 |
| VEGFR1_Y1327/Y1333        | P17948 | 1.53 | -    |
| VEGFR2_Y1054/Y1059        | P35968 | 1.36 | -    |
| VEGFR2_Y951               | P35968 | 1.38 | -    |
| VEGFR2_Y996               | P35968 | 1.36 | 0.81 |
| VINC_Y822                 | P18206 | 1.38 | -    |
| ZAP70_Y492/Y493           | P43403 | 1.59 | -    |

All values are estimated with  $p < 0.05$  and  $FDR = 0.1$

Supplementary table 3: Lindholm et al.
