# Supplementary material
Source: PubMed Central journal article supplement (PMC5528356)
Supplement: MOL2-6-418-s004.pdf [file MOL2-6-418-s004.pdf]

**Supplementary Table 4:**

Fold changes in kinase activity in the luminal-like xenografts, three and ten days after bevacizumab treatment

| <b>Bevacizumab/Control</b> |                     |              |               |
|----------------------------|---------------------|--------------|---------------|
| <b>Kinase substrate</b>    | <b>SwissProt ID</b> | <b>Day 3</b> | <b>Day 10</b> |
| ACHD_Y383/Y390             | Q07001              | 0.74         | -             |
| ANXA1_Y21                  | P04083              | 0.62         | -             |
| ANXA2_Y24                  | P07355              | 0.66         | -             |
| B3AT_Y46                   | P02730              | 0.59         | -             |
| C1R_Y204/Y210              | P00736              | 0.69         | -             |
| CBL_Y700                   | P22681              | 0.53         | -             |
| CD3Z_Y123                  | P20963              | 0.66         | -             |
| CD79A_Y182/Y188            | P11912              | 0.72         | -             |
| CDK2_Y15/Y19               | P24941              | 0.78         | -             |
| CTNB1_Y86                  | P35222              | 0.68         | -             |
| DCX_Y112                   | O43602              | 0.82         | -             |
| DDR1_Y513                  | Q08345              | 0.63         | -             |
| EGFR_Y1110                 | P00533              | 0.75         | -             |
| EGFR_Y869                  | P00533              | 0.63         | -             |
| ENOG_Y44                   | P09104              | 0.72         | -             |
| EPB4.1_Y660                | P11171              | 0.71         | -             |
| EPHA2_Y772                 | P29317              | 0.68         | -             |
| EPHA7_Y608/Y614            | Q15375              | 0.69         | -             |
| EPHB1_Y778                 | P54762              | 0.67         | -             |
| EPOR_Y368                  | P19235              | 0.72         | -             |
| EPOR_Y426                  | P19235              | 0.72         | -             |
| ERBB2_Y1248                | P04626              | 0.81         | -             |
| ERBB2_Y877                 | P04626              | 0.78         | -             |
| ERBB4_Y1188                | Q15303              | 0.51         | -             |
| ERBB4_Y1284                | Q15303              | 0.85         | -             |
| FAK1_Y570/Y576/Y577        | Q05397              | 0.84         | -             |
| FAK2_Y573/Y579/580         | Q14289              | 0.73         | -             |
| FER_Y714                   | P16591              | 0.73         | -             |
| FES_Y713                   | P07332              | 0.68         | -             |
| FGFR1_Y766                 | P11362              | 0.75         | -             |
| FGFR2_Y769                 | P21802              | 0.71         | -             |
| FGFR3_Y760                 | P22607              | 0.77         | -             |
| FRK_Y387                   | P42685              | 0.67         | -             |
| INSR_Y992/Y999             | P06213              | 0.76         | -             |
| JAK1_Y1022/Y1023           | P23458              | 0.74         | -             |
| JAK2_Y570                  | O60674              | 0.75         | -             |
| K2C6B_Y62                  | P04259              | 0.74         | -             |
| KSYK_Y525/Y526             | P43405              | 0.81         | -             |
| LAT_Y200                   | O43561              | 0.67         | -             |
| LAT_Y255                   | O43561              | 0.68         | -             |
| LCK_Y394                   | P06239              | 0.69         | -             |
| MET_Y1230/Y1234/Y1235      | P08581              | 0.85         | -             |
| MK01_Y187                  | P28482              | 0.89         | -             |
| MK07_Y215/Y220             | Q13164              | 0.79         | -             |
| MK10_Y223/Y228             | P53779              | 0.87         | -             |
| MK12_Y185                  | P53778              | 0.91         | -             |
| NTRK2_Y702/Y706/Y707       | Q16620              | 0.80         | -             |
| P85A_Y607                  | P27986              | 0.70         | -             |
| PAXI_Y118                  | P49023              | 0.74         | -             |
| PAXI_Y31/Y33               | P49023              | 0.74         | -             |
| PDGFRB_Y1009               | P09619              | 0.65         | -             |
| PDGFRB_Y1021               | P09619              | 0.63         | -             |
| PDGFRB_Y579/Y581           | P09619              | 0.70         | -             |
| PDGFRB_Y716                | P09619              | 0.70         | -             |
| PDGFRB_Y771/Y775/Y778      | P09619              | 0.74         | -             |
| PDGFRB_Y771/Y775/Y778      | P09619              | 0.77         | -             |
| PDPK1_Y373/Y376            | O15530              | 0.71         | -             |
| PDPK1_Y9                   | O15530              | 0.75         | -             |

|                           |        |      |   |
|---------------------------|--------|------|---|
| PECA1_Y713                | P16284 | 0.75 | - |
| PLCG1_Y771/Y775           | P19174 | 0.71 | - |
| PR_Y795                   | P06401 | 0.84 | - |
| PRRX2_Y208/Y214           | Q99811 | 0.75 | - |
| RAF1_Y340/Y341            | P04049 | 0.84 | - |
| RASA1_Y460                | P20936 | 0.74 | - |
| RET_Y1029                 | P07949 | 0.73 | - |
| RON_Y1353                 | Q04912 | 0.68 | - |
| RON_Y1353/Y1360           | Q04912 | 0.70 | - |
| SRC8_CHICK_Y477           | Q01406 | 0.70 | - |
| SRC8_CHICK_Y477/Y483      | Q01406 | 0.71 | - |
| SRC8_CHICK_Y492/Y499/Y502 | Q01406 | 0.73 | - |
| TEC_Y513/Y519             | P42680 | 0.77 | - |
| TNNT1_Y9                  | P13805 | 0.63 | - |
| VEGFR1_Y1327/Y1333        | P17948 | 0.72 | - |
| VEGFR2_Y1175              | P35968 | 0.70 | - |
| VEGFR2_Y996               | P35968 | 0.74 | - |
| VEGFR2_Y1054/1059         | P35968 | 0.86 | - |
| ZBT16_Y630                | Q05516 | 0.68 | - |

All values are estimated with  $p < 0.05$  and  $FDR = 0.1$

Supplementary table 4: Lindholm et al.
