# Supplementary material
Source: PubMed Central journal article supplement (PMC5528356)
Supplement: MOL2-6-418-s005.pdf [file MOL2-6-418-s005.pdf]

**Supplementary Table 5:**

Fold changes in kinase activity in the luminal-like xenografts, three and ten days after doxorubicin treatment

| <b>Doxorubicin/Control</b> |                     |              |               |
|----------------------------|---------------------|--------------|---------------|
| <b>Kinase substrate</b>    | <b>SwissProt ID</b> | <b>Day 3</b> | <b>Day 10</b> |
| ACHD_Y383/Y390             | Q07001              | -            | 1.76          |
| AMPE_Y12                   | Q07075              | 1.19         | -             |
| ANXA2_Y24                  | P07355              | -            | 2.27          |
| CALM_Y100                  | P62158              | -            | 1.91          |
| CBL_Y700                   | P22681              | -            | 1.82          |
| CD3Z_Y123                  | P20963              | -            | 3.38          |
| CD79A_Y182/Y188            | P11912              | -            | 1.74          |
| CDK2_Y15/Y19               | P24941              | -            | 2.47          |
| CTNB1_Y86                  | P35222              | 1.13         | 2.09          |
| DCX_Y112                   | O43602              | -            | 1.33          |
| DDR1_Y513                  | Q08345              | 1.41         | -             |
| DDR1_Y513                  | Q08345              | -            | 2.23          |
| EGFR_Y1110                 | P00533              | -            | 2.39          |
| EGFR_Y1172                 | P00533              | -            | 1.38          |
| EGFR_Y1197                 | P00533              | -            | 1.93          |
| ENOG_Y44                   | P09104              | -            | 2.27          |
| EPB4.1_Y660                | P11171              | -            | 1.95          |
| EPHA1_Y781                 | P21709              | -            | 2.01          |
| EPHA2_Y772                 | P29317              | -            | 2.26          |
| EPHA7_Y608/614             | Q15375              | -            | 1.86          |
| EPHB1_Y778                 | P54762              | -            | 2.12          |
| EPOR_Y368                  | P19235              | -            | 2.38          |
| EPOR_Y426                  | P19235              | -            | 2.27          |
| ERBB2_Y1248                | P04626              | 1.13         | 1.56          |
| ERBB2_Y877                 | P04626              | -            | 1.45          |
| ERBB4_Y1284                | Q15303              | -            | 1.33          |
| FAK1_Y570/Y576/Y577        | Q05397              | -            | 1.58          |
| FAK2_Y573/Y579/Y580        | Q14289              | -            | 1.57          |
| FER_Y714                   | P16591              | -            | 2.19          |
| FES_Y713                   | P07332              | -            | 2.43          |
| FGFR1_Y766                 | P11362              | -            | 1.94          |
| FGFR2_Y769                 | P21802              | -            | 1.73          |
| FGFR3_Y760                 | P22607              | -            | 1.70          |
| FRK_Y387                   | P42685              | -            | 2.53          |
| INSR_Y1355                 | P06213              | -            | 1.16          |
| INSR_Y992/Y999             | P06213              | -            | 1.60          |
| JAK1_Y1022/Y1023           | P23458              | -            | 1.97          |
| JAK2_Y570                  | O60674              | -            | 1.82          |
| K2C6B_Y62                  | P04259              | -            | 1.80          |
| KSYK_Y525/Y526             | P43405              | -            | 1.48          |
| LAT_Y200                   | O43561              | -            | 1.64          |
| LAT_Y255                   | O43561              | -            | 1.65          |
| MBP_Y203                   | P02686              | -            | 1.16          |
| MBP_Y261/Y268              | P02686              | 1.15         | 1.32          |
| MBP_Y268                   | P02686              | -            | 1.15          |
| MET_Y1230/Y1234/Y1235      | P08581              | 1.17         | 1.73          |
| MK01_Y187                  | P28482              | 1.11         | 1.36          |
| MK07_Y215/Y220             | Q13164              | -            | 1.66          |
| MK10_Y223/Y228             | P53779              | -            | 1.34          |
| MK12_Y185                  | P53778              | -            | 1.46          |
| NTRK2_Y702/Y706/Y707       | Q16620              | -            | 1.89          |
| ODBA_Y345                  | P12694              | 1.29         | 1.28          |
| P85A_Y607                  | P27986              | -            | 2.11          |
| PAXI_Y118                  | P49023              | -            | 2.19          |
| PAXI_Y31/Y33               | P49023              | -            | 2.20          |

|                           |        |      |      |
|---------------------------|--------|------|------|
| PDGFRB_Y1009              | P09619 | -    | 2.66 |
| PDGFRB_Y1021              | P09619 | -    | 1.71 |
| PDGFRB_Y579/Y581          | P09619 | -    | 2.04 |
| PDGFRB_Y716               | P09619 | 1.12 | 2.20 |
| PDGFRB_Y771/Y775/Y778     | P09619 | -    | 2.13 |
| PDGFRB_Y771/Y775/Y778     | P09619 | -    | 2.23 |
| PDPK1_Y373/Y376           | O15530 | -    | 1.67 |
| PDPK1_Y9                  | O15530 | -    | 2.13 |
| PECA1_Y713                | P16284 | -    | 2.49 |
| PLCG1_Y771/Y775           | P19174 | -    | 2.29 |
| PP2AB_Y307                | P62714 | 1.13 | 1.19 |
| PR_Y795                   | P06401 | -    | 1.88 |
| PRRX2_Y208/Y214           | Q99811 | -    | 2.19 |
| PTN11_Y546/Y551           | Q06124 | -    | 1.28 |
| RAF1_Y340/341             | P04049 | 1.12 | 1.77 |
| RASA1_Y460                | P20936 | -    | 2.17 |
| RB_Y805/Y813              | P06400 | 1.23 | 1.30 |
| RON_Y1352/Y1360           | Q04912 | -    | 2.58 |
| RON_Y1353                 | Q04912 | 1.16 | 2.13 |
| SRC8_CHICK_Y477/Y483      | Q01406 | -    | 2.48 |
| SRC8_CHICK_Y492/Y499/Y502 | Q01406 | -    | 2.15 |
| TEC_Y513/Y519             | P42680 | -    | 1.71 |
| TNNT1_Y9                  | P13805 | -    | 1.37 |
| TYRO3_Y681/Y685/Y686      | Q06418 | 1.18 | 1.18 |
| VEGFR1_Y1327/Y1333        | P17948 | -    | 2.19 |
| VEGFR2_Y1054              | P35968 | 1.17 | -    |
| VEGFR2_Y1054/Y1059        | P35968 | -    | 1.64 |
| VEGFR2_Y1175              | P35968 | -    | 2.19 |
| VEGFR2_Y996               | P35968 | -    | 2.33 |
| VINC_Y822                 | P18206 | 1.22 | 1.43 |
| ZAP70_Y492/Y493           | P43403 | -    | 2.20 |
| ZBT16_Y630                | Q05516 | -    | 1.28 |

All values are estimated with  $p < 0.05$  and  $FDR = 0.1$
